# Supplementary material
Source: Springer Nature journal article supplement (https://www.springermedizin.de/resource/supplementary/12885_2013_4548_MOESM2_ESM.pdf/9466686)

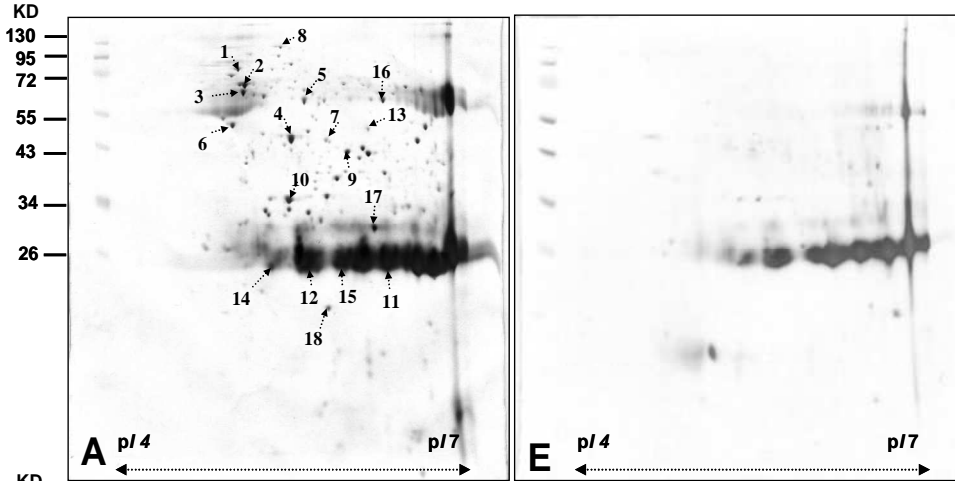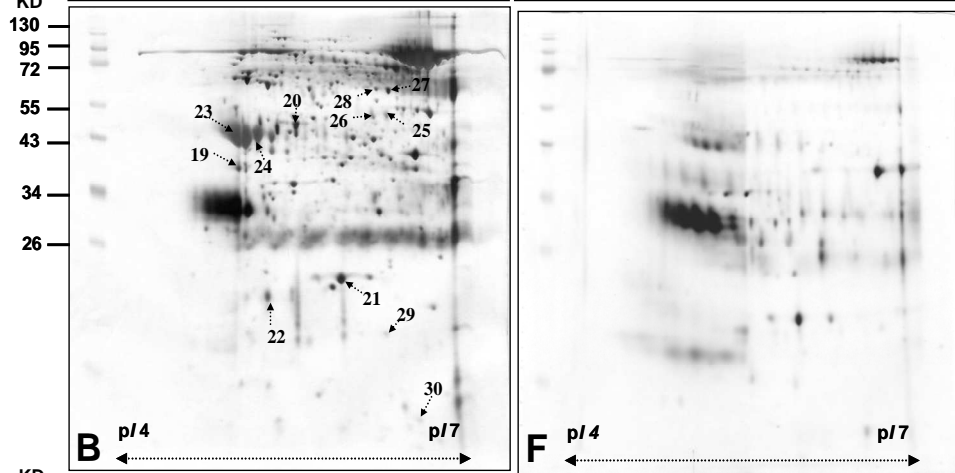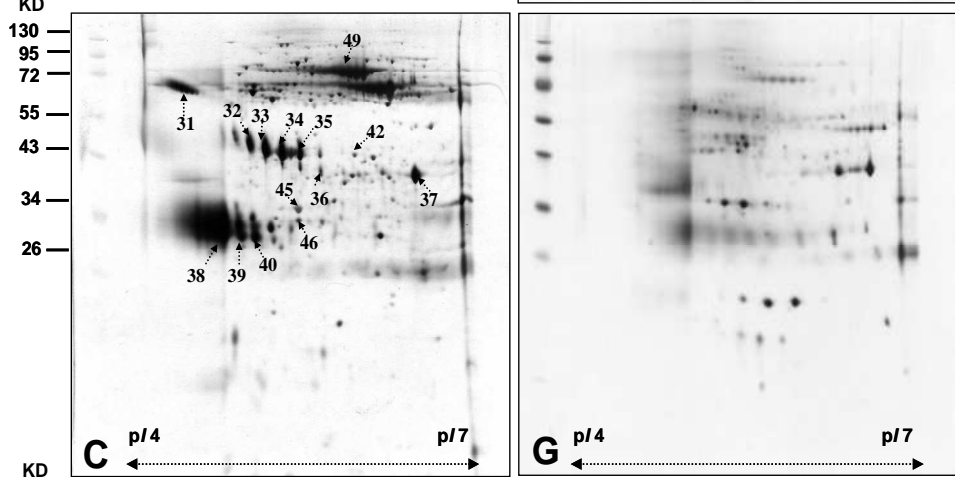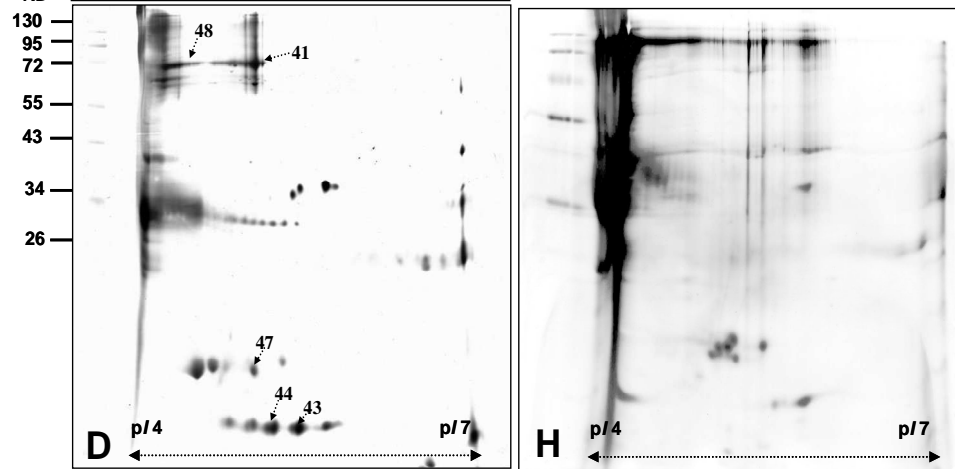

Supplement: MOESM2 [file 9466686]
